# Supplementary material
Source: publisher site journal article supplement (https://www.spandidos-publications.com/7169/downloadSupplementary)
Supplement: Supplementary file 1 [file downloadSupplementary]

Table SI. Plant extracts.

| No. | Plant                                                        | Part used    |
|-----|--------------------------------------------------------------|--------------|
| 1   | <i>Celtis choseniana</i> Nakai                               | Leaf         |
| 2   | <i>Eleocharis equisetiformis</i> (Meinsh.) B.Fedtsch.        | Top          |
| 3   | <i>Populus nigra</i> var. <i>italica</i> Koehne              | Branch       |
| 4   | <i>Kerria japonica</i> (L.) DC.                              | Branch       |
| 5   | <i>Iris pseudacorus</i> L.                                   | Seed         |
| 6   | <i>Campsis grandiflora</i> (Thunb.) K.Schum.                 | Branch       |
| 7   | <i>Elaeagnus multiflora</i> Thunb.                           | Branch       |
| 8   | <i>Diplazium subsinuatum</i> (Wall. ex Hook. & Grev.) Tagawa | Whole plant  |
| 9   | <i>Buddleja davidii</i> Franch.                              | Leaf, branch |
| 10  | <i>Phyllostachys bambusoides</i> Siebold & Zucc.             | Leaf, branch |
| 11  | <i>Cimicifuga japonica</i> (Thunb.) Spreng.                  | Whole plant  |
| 12  | <i>Galinsoga ciliata</i> (Raf.) S.F.Blake                    | Whole plant  |
| 13  | <i>Ilex integra</i> Thunb.                                   | Stalk        |
| 14  | <i>Lespedeza cuneata</i> G.Don                               | Top          |
| 15  | <i>Tilia taquetii</i> C.K.Schneid.                           | Leaf, branch |
| 16  | <i>Euonymus japonicus</i> 'Microphyllus'                     | Branch       |
| 17  | <i>Prunus sibirica</i> L.                                    | Branch       |
| 18  | <i>Boehmeria pannosa</i> Nakai & Satake                      | Leaf, stalk  |
| 19  | <i>Akebia quinata</i> (Houtt.) Decne.                        | Leaf, stalk  |
| 20  | <i>Celastrus stephanotiifolius</i> Makino                    | Branch       |
| 21  | <i>Tritonia x crocosmiiflora</i> G.Nicholson                 | Whole plant  |

|    |                                                                          |              |
|----|--------------------------------------------------------------------------|--------------|
| 22 | <i>Orixa japonica</i> Thunb.                                             | Leaf         |
| 23 | <i>Eurya emarginata</i> (Thunb.)<br>Makino                               | Leaf         |
| 24 | <i>Ajania pacifica</i> (Nakai)<br>K.Bremer & Humphries                   | Whole plant  |
| 25 | <i>Strelitzia reginae</i> Banks                                          | Top          |
| 26 | <i>Inula britannica</i> var. <i>japonica</i><br>(Thunb.) Franch. & Sav.  | Whole plant  |
| 27 | <i>Stellaria aquatica</i> (L.) Scop.                                     | Whole plant  |
| 28 | <i>Aspidistra elatior</i> Blume                                          | Whole plant  |
| 29 | <i>Agave americana</i> L.                                                | Top          |
| 30 | <i>Zanthoxylum schinifolium</i><br>Siebold & Zucc.                       | Branch       |
| 31 | <i>Ligustrum quihoui</i><br>var. <i>latifolium</i> Nakai                 | Branch       |
| 32 | <i>Quercus glauca</i> Thunb.                                             | Branch       |
| 33 | <i>Justicia procumbens</i> L.                                            | Whole plant  |
| 34 | <i>Crataegus pinnatifida</i> for. <i>pilosa</i><br>(C.K.Schneid.) Kitag. | Branch       |
| 35 | <i>Meliosma oldhamii</i> Maxim.                                          | Leaf         |
| 36 | <i>Salix caprea</i> L.                                                   | Branch       |
| 37 | <i>Damnacanthus indicus</i><br>C.F.Gaertn.                               | Leaf, branch |
| 38 | <i>Citrus tachibana</i> (Makino) Yu.<br>Tanaka                           | Stalk        |
| 39 | <i>Hibiscus hamabo</i> Siebold &<br>Zucc.                                | Leaf         |
| 40 | <i>Taxus cuspidata</i> var. <i>latifolia</i><br>(Pilg.) Nakai            | Branch       |
| 41 | <i>Dracocephalum argunense</i><br>Fisch. ex Link                         | Whole plant  |
| 42 | <i>Ficus erecta</i> var. <i>sieboldii</i> (Miq.)<br>King                 | Branch       |
| 43 | <i>Corydalis incisa</i> (Thunb.) Pers.<br>*                              | Whole plant  |

|    |                                                                    |              |
|----|--------------------------------------------------------------------|--------------|
| 44 | <i>Semiaquilegia adoxoides</i> (DC.) Makino                        | Whole plant  |
| 45 | <i>Stauntonia hexaphylla</i> (Thunb.) Decne.                       | Leaf, stalk  |
| 46 | <i>Youngia japonica</i> (L.) DC.                                   | Whole plant  |
| 47 | <i>Torilis japonica</i> (Houtt.) DC.                               | Root         |
| 48 | <i>Vitex rotundifolia</i> L.f.                                     | Leaf, stalk  |
| 49 | <i>Carpinus tschonoskii</i> Maxim.                                 | Leaf, branch |
| 50 | <i>Dryopteris crassirhizoma</i> Nakai                              | Top          |
| 51 | <i>Lagerstroemia indica</i> L.                                     | Branch       |
| 52 | <i>Acer triflorum</i> Kom.                                         | Branch       |
| 53 | <i>Sorbaria sorbifolia</i> var. <i>stellipila</i> Maxim.           | Branch       |
| 54 | <i>Rubus oldhamii</i> Miq.                                         | Root         |
| 55 | <i>Veronica persica</i> Poir.                                      | Whole plant  |
| 56 | <i>Malus baccata</i> var. <i>mandshurica</i> (Maxim.) C.K.Schneid. | Branch       |
| 57 | <i>Fatsia japonica</i> (Thunb.) Decne. & Planch.                   | Leaf, stalk  |
| 58 | <i>Ligularia taquetii</i> (H.Lev. & Vaniot) Nakai                  | Whole plant  |
| 59 | <i>Caryopteris divaricata</i> (Siebold & Zucc.) Maxim.             | Top          |
| 60 | <i>Diplotaxis muralis</i> DC.                                      | Whole plant  |
| 61 | <i>Isodon inflexus</i> (Thunb.) Kudo                               | Whole plant  |
| 62 | <i>Carpinus laxiflora</i> (Siebold & Zucc.) Blume                  | Whole plant  |
| 63 | <i>Lonicera praeflorens</i> Batalin                                | Branch       |
| 64 | <i>Prunus speciosa</i> (Koidz.) Nakai                              | Branch       |
| 65 | <i>Sisymbrium officinale</i> (L.) Scop.                            | Whole plant  |
| 66 | <i>Leonurus japonicus</i> Houtt.                                   | Root         |
| 67 | <i>Larix kaempferi</i> (Lamb.) Carriere                            | Branch       |

|    |                                                                       |             |
|----|-----------------------------------------------------------------------|-------------|
| 68 | <i>Artemisia fukudo</i> Makino                                        | Whole plant |
| 69 | <i>Phryma leptostachya</i> var.<br><i>asiatica</i> H. Hara            | Whole plant |
| 70 | <i>Photinia glabra</i> (Thunb.)<br>Maxim.                             | Leaf, stalk |
| 71 | <i>Corylopsis gotoana</i> var. <i>coreana</i><br>(Uyeki) T.Yamaz.     | Branch      |
| 72 | <i>Ribes fasciculatum</i> var. <i>chinense</i><br>Maxim.              | Branch      |
| 73 | <i>Metasequoia glyptostroboides</i><br>Hu & W.C.Cheng                 | Branch      |
| 74 | <i>Arundo donax</i> L.                                                | Top         |
| 75 | <i>Cercis chinensis</i> Bunge                                         | Branch      |
| 76 | <i>Rhynchosia volubilis</i> Lour.                                     | Top         |
| 77 | <i>Spodiopogon sibiricus</i> Trin.                                    | Whole plant |
| 78 | <i>Canavalia lineata</i> (Thunb.) DC.                                 | Whole plant |
| 79 | <i>Ulmus laciniata</i> (Trautv.) Mayr                                 | Leaf        |
| 80 | <i>Fraxinus sieboldiana</i> var.<br><i>quadrijuga</i> (Nakai) T.B.Lee | Leaf        |
| 81 | <i>Artemisia montana</i><br>(Nakai) Pamp.                             | Whole plant |
| 82 | <i>Pennisetum alopecuroides</i> (L.)<br>Spreng.                       | Whole plant |
| 83 | <i>Malus sieboldii</i> (Regel) Rehder                                 | Branch      |
| 84 | <i>Idesia polycarpa</i> Maxim.                                        | Branch      |
| 85 | <i>Boehmeria spicata</i><br>(Thunb.) Thunb.                           | Branch      |
| 86 | <i>Prunus verecunda</i> var. <i>pendula</i><br>(Nakai) W.T.Lee        | Branch      |
| 87 | <i>Clinopodium chinense</i> var.<br><i>parviflorum</i> (Kudo) H. Hara | Whole plant |
| 88 | <i>Acer pictum</i> subsp. <i>mono</i><br>(Maxim.) Ohashi              | Leaf        |
| 89 | <i>Cornus macrophylla</i> Wall.                                       | Leaf        |
| 90 | <i>Litsea japonica</i> (Thunb.) Juss.                                 | Branch      |

|     |                                                                    |             |
|-----|--------------------------------------------------------------------|-------------|
| 91  | <i>Sambucus sieboldiana</i> var.<br><i>pendula</i> (Nakai) T.B.Lee | Leaf        |
| 92  | <i>Sorghum</i><br><i>halepense</i> for. <i>muticum</i> Hubb.       | Whole plant |
| 93  | <i>Mirabilis jalapa</i> L.                                         | Whole plant |
| 94  | <i>Aster arenarius</i> (Kitam.)<br>Nemoto                          | Whole plant |
| 95  | <i>Euodia daniellii</i> Hemsl.                                     | Leaf        |
| 96  | <i>Osmanthus x fortunei</i>                                        | Leaf        |
| 97  | <i>Ligustrum obtusifolium</i> Siebold<br>& Zucc.                   | Leaf        |
| 98  | <i>Ficus erecta</i> Thunb.                                         | Branch      |
| 99  | <i>Gardneria insularis</i> Nakai                                   | Leaf        |
| 100 | <i>Rudbeckia bicolor</i> Nutt.                                     | Seed        |
| 101 | <i>Corydalis speciosa</i> Maxim.                                   | Whole plant |

-. Negative; +, positive.

Table SII. Characteristics of patients with AML.

| No. | Diagnosis                                       | Cytogenetics                                                                                                            | Immunophenotype                                                                                                                                                                                                                                                                                                                                                                           | Mutation   |
|-----|-------------------------------------------------|-------------------------------------------------------------------------------------------------------------------------|-------------------------------------------------------------------------------------------------------------------------------------------------------------------------------------------------------------------------------------------------------------------------------------------------------------------------------------------------------------------------------------------|------------|
| 1   | Acute monocytic leukemia                        | 47,XY,+8(3)/46,XY(14).                                                                                                  | Population 1: CD34 <sup>-</sup> , CD11c <sup>+</sup> , CD33 <sup>+</sup> , CD56 <sup>+</sup> , CD64 <sup>+</sup> , HLA-DR <sup>+</sup> , MPO dim <sup>+</sup><br>Population 2: CD34 <sup>-</sup> , CD4 <sup>+</sup> , CD11c <sup>+</sup> , CD13 <sup>+</sup> , CD14 <sup>+</sup> , CD33 <sup>+</sup> , CD56 <sup>+</sup> , CD64 <sup>+</sup> , MPO dim <sup>+</sup> , HLA-DR <sup>+</sup> | IDH1, ETV6 |
| 2   | Acute myeloid leukemia, r/o AML with maturation | 46,XY(20), no clonal abnormalities                                                                                      | CD34 <sup>+</sup> , CD13dim <sup>+</sup> , CD33 <sup>+</sup> , CD117 <sup>+</sup> , HLA-DR <sup>+</sup> , MPO <sup>+</sup> , CD7 <sup>+</sup>                                                                                                                                                                                                                                             | CEBPA      |
| 3   | Acute myeloid leukemia, r/o AML-MRC             | 46,XY[20], no clonal abnormality                                                                                        | CD34 <sup>+</sup> , CD13 <sup>+</sup> , CD33 <sup>+</sup> , CD117 <sup>+</sup> , HLA-DR <sup>+</sup> , MPO <sup>+</sup>                                                                                                                                                                                                                                                                   | None       |
| 4   | AML-MRC                                         | 50~53,XY,+1,+5,del(5)(q13),del(5)(q13)x2,+6,+8,i(11)(q10),+18,+19,+21,-22,+1~2mar[cp14] / 46,XY,del(5)(q13)(4)/46,XY(2) | CD13 <sup>+</sup> ,CD20dim <sup>+</sup> ,CD33 <sup>+</sup> ,CD34dim <sup>+</sup> ,CD71 <sup>+</sup> ,cCD79a <sup>+</sup> ,MPO <sup>+</sup> ,HLA-DR <sup>+</sup> ,TdT dim <sup>+</sup>                                                                                                                                                                                                     | KMT2A      |

AML, Acute myeloid leukemia; r/o, rule out; MRC, myelodysplasia related changes;

HLA-DR, human leukocyte antigen-antigen D-related; MPO, myeloperoxidase; TdT,

terminal deoxynucleotidyl transferase.
